# Supplementary material
Source: PubMed Central journal article supplement (PMC3415999)
Supplement: supp_112.141580_141580SI.pdf [file supp_112.141580_141580SI.pdf]

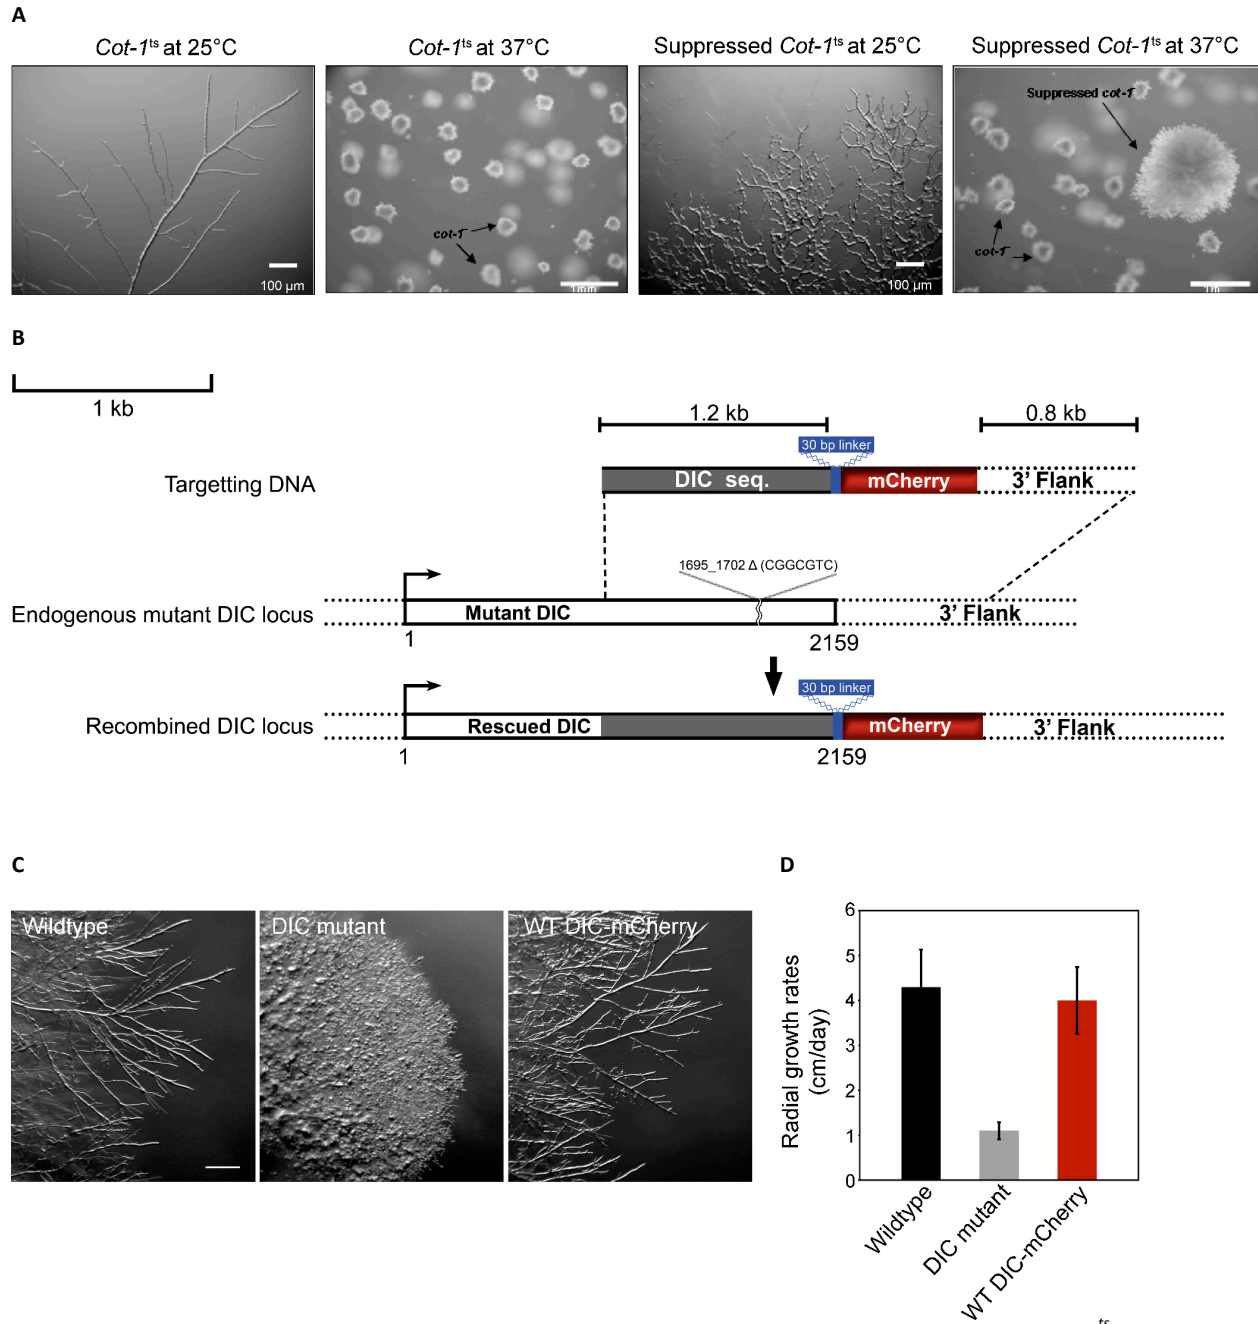

**Figure S1** Generation of DIC-mCherry expressing *N. crassa* strain. **A.** *N. crassa* colony morphology. When a *cot1<sup>ts</sup>* (top, left panel) strain is grown at permissive temperature (25°C), it exhibits straight hyphal growth morphology. At restrictive temperature (top, right panel; 37°C) *cot1<sup>ts</sup>* strains exhibit compact colony growth. *cot1<sup>ts</sup>* suppression mediated by *ropy* mutations lead to curly hyphal growth morphologies at permissive temperatures (bottom, left panel) and enlarged colony morphology at restrictive temperatures (bottom, right panel). **B.** A schematic representation of the targeting DNA consisting of mCherry coding sequence flanked by upstream (1.8kb) and downstream (0.8 kb) homologous sequences to the genomic locus of DIC. A DIC mutant strain (*ro-6<sup>7bp Δ 1695</sup>*) exhibiting *ropy* hyphal growth morphology was used for transformation. Homologous recombination of the targeting DNA into the *ro-6<sup>7bp Δ 1695</sup>* locus resulted in the rescue of the *ropy* phenotype and restoration of wildtype hyphal growth morphology. **C.** Comparison of colony morphologies between wildtype, DIC mutant *ro-6<sup>7bp Δ 1695</sup>* and wildtype DIC-mCherry strains. Note that the wildtype DIC-mCherry strain exhibits growth morphology is indistinguishable from the wildtype strain. **D.** Bar graph showing radial growth rates of wildtype, DIC mutant *ro-6<sup>7bp Δ 1695</sup>*, WT - DIC-mCherry strains. Data are shown as mean  $\pm$  S.D.

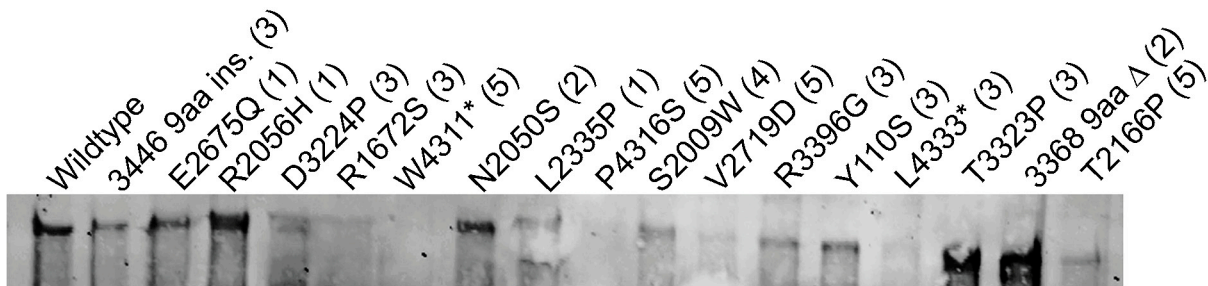

**Figure S2** Protein levels in representative DHC mutant strains. Western blot analysis of DHC expression/protein levels in 17 of the 34 mutant strains, including at least one representative from every class. The class of each strain is indicated in parentheses after the designated strain name.

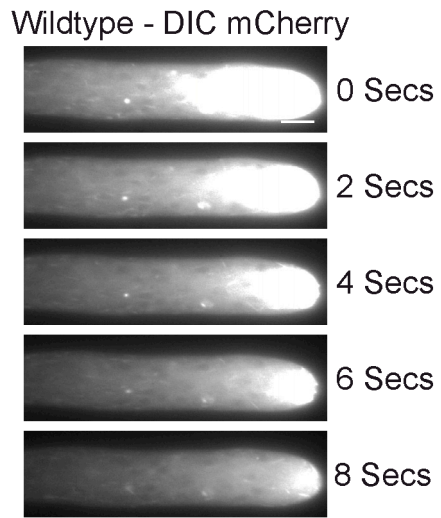

**Figure S3** An 8-second time series showing photobleaching of bright hyphal tip dynein fluorescence in a wildtype strain. Bars: 10  $\mu\text{m}$ .

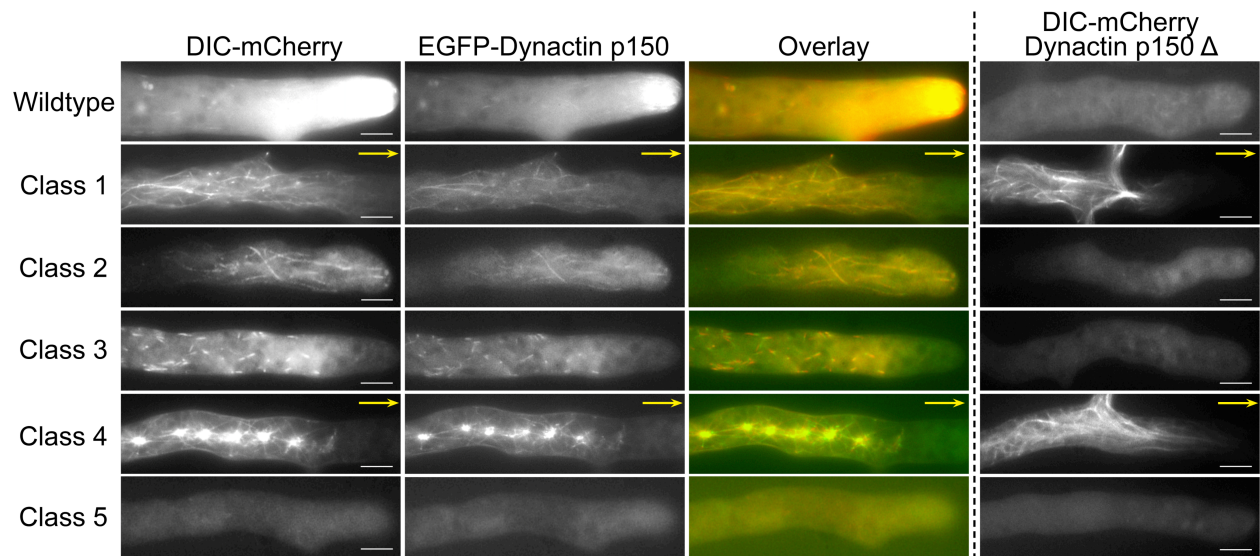

**Figure S4** Colocalization of dynein and dynactin in wildtype and DHC mutant strains. **A.** Epifluorescence images of growing hyphae in strains expressing DIC-mCherry and EGFP- dynactin p150. Left panels: dynein; middle panels: dynactin, right panels: overlay. **B.** Epifluorescence images of growing hyphae in strains expressing DIC-mCherry in dynactin p150 null background. Bars: 10  $\mu$ m in all panels.

**A**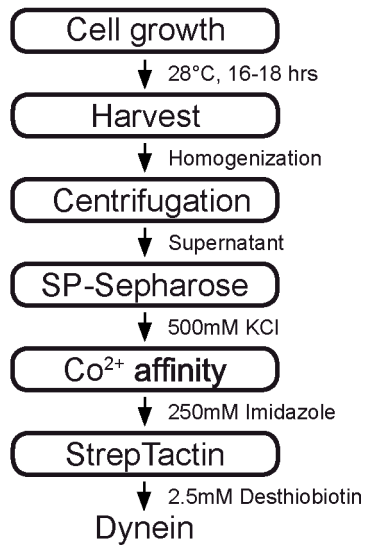**B**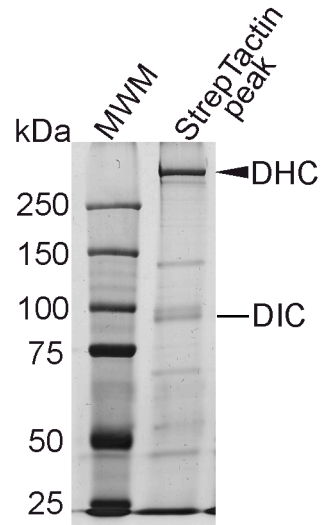

**Figure S5** **A.** Dynein purification scheme for *N.crassa*. **B.** Representative silver-stained gel image showing the final elution fraction from the StrepTrap column. The arrow points to the DHC band and the bar indicates the band corresponding to the tagged DIC.

## Files S1-S9

### Supporting Movies

Representative live cell movies of FM 4-64 labeled vesicle trafficking in hyphal tips from each of the strains analyzed. Each movie was of 30 seconds duration and is sped up six-fold. Each movie is 86  $\mu\text{m}$  x 65  $\mu\text{m}$  in size.

Files S1-S9 are available for download at <http://www.genetics.org/content/suppl/2012/05/29/genetics.112.141580.DC1> as compressed .avi files.

**Table S1 Summary of vesicle transport dynamics.**

|                                                               | Wildtype        | DHC $\Delta$        | p150 $\Delta$       | Nkin mut.           | Class 1             | Class 2             | Class 3          | Class 4             | Class 5             |
|---------------------------------------------------------------|-----------------|---------------------|---------------------|---------------------|---------------------|---------------------|------------------|---------------------|---------------------|
| Motility index                                                | 21.5            | 5.8                 | 8.3                 | 4.1                 | 10.4                | 4.9                 | 9.4              | 7.4                 | 6.2                 |
| Overall movements                                             |                 |                     |                     |                     |                     |                     |                  |                     |                     |
| Mean movements/<br>$\mu\text{m}$ hyphal length                | 2.9             | 1.2                 | 1.8                 | 0.8                 | 1.5                 | 1.2                 | 2.4              | 1.7                 | 1.1                 |
| <i>n</i>                                                      | 557             | 185                 | 286                 | 162                 | 199                 | 110                 | 247              | 200                 | 170                 |
| Mean velocity<br>( $\mu\text{m}/\text{sec} \pm \text{S.D.}$ ) | 1.64 $\pm$ 0.59 | 1.46 $\pm$<br>0.62* | 1.34 $\pm$<br>0.49* | 1.35 $\pm$<br>0.52* | 1.51 $\pm$<br>0.59* | 1.24 $\pm$<br>0.41* | 1.33 $\pm$ 0.45* | 1.33 $\pm$<br>0.41* | 1.31 $\pm$<br>0.48* |
| Mean distance<br>( $\mu\text{m} \pm \text{S.D.}$ )            | 4.26 $\pm$ 0.54 | 3.03 $\pm$<br>1.71* | 3.19 $\pm$<br>1.44* | 3.49 $\pm$<br>2.07* | 4.48 $\pm$ 2.59     | 3.21 $\pm$<br>1.64* | 2.85 $\pm$ 1.15* | 3.17 $\pm$<br>1.33* | 3.96 $\pm$ 2.33     |
| Inward movements                                              |                 |                     |                     |                     |                     |                     |                  |                     |                     |
| Percent of total<br>movements                                 | 48.7 %          | 47.1 %              | 48.9 %              | 48.8 %              | 41.7 %              | 52.7 %              | 53.8 %           | 41.5 %              | 47.1 %              |
| Mean velocity<br>( $\mu\text{m}/\text{sec} \pm \text{S.D.}$ ) | 1.60 $\pm$ 0.55 | 1.36 $\pm$<br>0.53* | 1.27 $\pm$<br>0.51* | 1.36 $\pm$<br>0.53* | 1.43 $\pm$<br>0.54* | 1.23 $\pm$<br>0.45* | 1.29 $\pm$ 0.48* | 1.24 $\pm$<br>0.40* | 1.28 $\pm$<br>0.53* |
| Mean distance<br>( $\mu\text{m} \pm \text{S.D.}$ )            | 4.16 $\pm$ 2.47 | 2.70 $\pm$<br>1.27* | 2.78 $\pm$<br>1.12* | 3.23 $\pm$<br>1.88* | 3.90 $\pm$ 2.62     | 2.86 $\pm$<br>1.38* | 2.69 $\pm$ 1.02* | 2.66 $\pm$<br>0.96* | 3.77 $\pm$ 2.40     |
| Outward movements                                             |                 |                     |                     |                     |                     |                     |                  |                     |                     |
| Percent of total<br>movements                                 | 51.3 %          | 52.9 %              | 51.1 %              | 51.2 %              | 58.3 %              | 47.3 %              | 46.2 %           | 58.5 %              | 52.9 %              |
| Mean velocity<br>( $\mu\text{m}/\text{sec} \pm \text{S.D.}$ ) | 1.67 $\pm$ 0.61 | 1.55 $\pm$ 0.69     | 1.41 $\pm$<br>0.47* | 1.35 $\pm$<br>0.51* | 1.56 $\pm$ 0.62     | 1.24 $\pm$<br>0.36* | 1.38 $\pm$ 0.42* | 1.40 $\pm$<br>0.41* | 1.35 $\pm$<br>0.44* |
| Mean distance<br>( $\mu\text{m} \pm \text{S.D.}$ )            | 4.36 $\pm$ 2.60 | 3.32 $\pm$<br>1.98* | 3.59 $\pm$<br>1.59* | 3.75 $\pm$<br>2.22* | 4.89 $\pm$ 2.49     | 3.57 $\pm$<br>1.83* | 3.05 $\pm$ 1.27* | 3.53 $\pm$<br>1.45* | 4.13 $\pm$ 2.26     |
| Vesicle accumulation                                          |                 |                     |                     |                     |                     |                     |                  |                     |                     |
| Hyphal tip vesicle<br>accumulation                            | 60.0 %          | 92.3 %              | 27.3 %              | 100 %               | 72.7 %              | 86.7 %              | 90.0 %           | 78.6 %              | 100 %               |
| Hyphal body vesicle<br>accumulation                           | 13.3 %          | 7.7 %               | 90.9 %              | 0 %                 | 9.1 %               | 6.7 %               | 20.0 %           | 21.4 %              | 0 %                 |

\* = statistically significant difference from wild-type value as determined by students t-test ( $P < 0.05$ ).

**Table S2 Summary of dynein mislocalization phenotypes.**

| Mislocalization phenotype                      | Domain                             | Mutation                        |
|------------------------------------------------|------------------------------------|---------------------------------|
| Class 1<br>(Distal -<br>long linear<br>tracks) | AAA1 (Turn p-loop)                 | G1946R                          |
|                                                | AAA1 (H4)                          | R2056H                          |
|                                                | AAA2 (PS1 Insert)                  | S2333R                          |
|                                                | AAA2 (PS I Insert)                 | L2335P                          |
|                                                | AAA3 ( $\beta$ 3/Walker B)         | E2675Q                          |
|                                                | AAA5 (Strut C1)                    | 3739 6aa $\Delta$ (RRSNLI)      |
| Class 2<br>(Apical -<br>long linear<br>tracks) | AAA1(Sensor 1 ( $\beta$ 4))        | N2050S                          |
|                                                | AAA3 ( $\beta$ 4 before sensor 1 ) | C2722R                          |
|                                                | MT Stalk (H8 - CC1)                | 3268 9aa $\Delta$ (SLEIQAALE)   |
|                                                | AAA6 (H1)                          | V4049D                          |
| Class 3<br>(Comet tails)                       | Tail                               | Y110S                           |
|                                                | Tail                               | W1308G                          |
|                                                | Linker Subdomain 3 (H11 )          | R1672S                          |
|                                                | MT Stalk (H8 - CC1)                | D3224P                          |
|                                                | MT-binding domain (H1) o)MTBD      | T3323P                          |
|                                                | MT-Stalk (CC2)                     | L3332P                          |
|                                                | MT-binding domain (H7)             | R3396G                          |
|                                                | MT-stalk ( H9 - CC2)               | 3446 9aa ins.                   |
|                                                | C-terminus (H1)                    | L4333*                          |
| Class 4<br>(Aggregates)                        | AAA1 (H3)                          | S2009W                          |
|                                                | MT-BS (H8 stalk CC1)               | G3215D                          |
|                                                | AAA5 (Strut C1)                    | 3756 7aa $\Delta$ (QLEKLL)      |
| Class 5<br>(Disperse)                          | AAA1 (H0)                          | L1933P                          |
|                                                | AAA1 (AAA1 H1 and B2)              | G1961R                          |
|                                                | AAA1 (H4/ $\beta$ 4 R finger)      | K2065E                          |
|                                                | AAA1 (H8)                          | T2166P                          |
|                                                | AAA3 ( $\beta$ 4 before sensor 1)  | V2719D                          |
|                                                | AAA5 (H0)                          | I3591P                          |
|                                                | AAA6 (H5)                          | G4146A                          |
|                                                | AAA6 (H7)                          | E4168K                          |
|                                                | AAA6 (between H8-H9)               | I4232N                          |
|                                                | AAA6 (between h11 and h12)         | D4296E; 4297 3aa $\Delta$ (LVV) |
|                                                | AAA6 (H12)                         | W4311*                          |
|                                                | AAA6 ( between H12-H13)            | P4316S                          |

AAA- AAA domains of dynein, MT – microtubule, H – helix,  $\beta$  –  $\beta$  strand, CC- coiled-coil, aa - amino acid,  $\Delta$  - deletion, ins - insertion, \* - nonsense mutation.



**Table S3 Primary *Neurospora crassa* strains used in this study.**

| Genotype                                                                          | Source     | Description                                         |
|-----------------------------------------------------------------------------------|------------|-----------------------------------------------------|
| <i>mat a</i>                                                                      | FGSC       | WT strain (FGSC # 4200)                             |
| <i>mat A</i>                                                                      | FGSC       | WT strain (FGSC # 2489)                             |
| <i>mat a; kin-1</i>                                                               | FGSC       | Nkin mutant strain (FGSC # 9939)                    |
| <i>mat a; ro-1::hygr</i>                                                          | This study | DHC $\Delta$ mutant strain                          |
| <i>mat a; ro-3::hygr</i>                                                          | FGSC       | Dynactin p150 $\Delta$ mutant strain (FGSC # 14726) |
| <i>rid(RIP1) mat A his-3<sup>+</sup>::Pccg-1-Bml<sup>+</sup>-sgfp<sup>+</sup></i> | FGSC       | Tubulin-GFP strain (FGSC # 9520)                    |
| <i>mat A his-3<sup>+</sup>::Pccg-1-hH1<sup>+</sup>-sgfp<sup>+</sup></i>           | FGSC       | Histone h1-GFP strain (FGSC # 9518)                 |
| <i>mat a ro-6<sup>7bp <math>\Delta</math> 1695</sup></i>                          | This study | DIC mutant strain                                   |
| <i>mat A ro-6<sup>+</sup>::mCherry<sup>+</sup></i>                                | This study | WT DIC-mCherry strain                               |
| <i>mat A ro-6<sup>+</sup>::mCherry<sup>+</sup>; kin-1</i>                         | This study | Nkin mutant - DIC-mCherry strain                    |
| <i>mat A ro-6<sup>+</sup>::mCherry<sup>+</sup>; <math>\Delta</math> ro-3</i>      | This study | Dynactin p150 $\Delta$ mutant - DIC-mCherry strain  |
| <i>mat A; ro-3<sup>+</sup>::egfp<sup>+</sup></i>                                  | This study | WT EGFP-Dynactin p150 strain                        |
| <i>mat A ro-6<sup>+</sup>::hs<sup>+</sup></i>                                     | This study | WT DIC-6xHis-Strep-tag II strain                    |
