# Supplementary material
Source: PubMed Central journal article supplement (PMC3415999)
Supplement: supp_112.141580_FigureS2.pdf [file supp_112.141580_FigureS2.pdf]

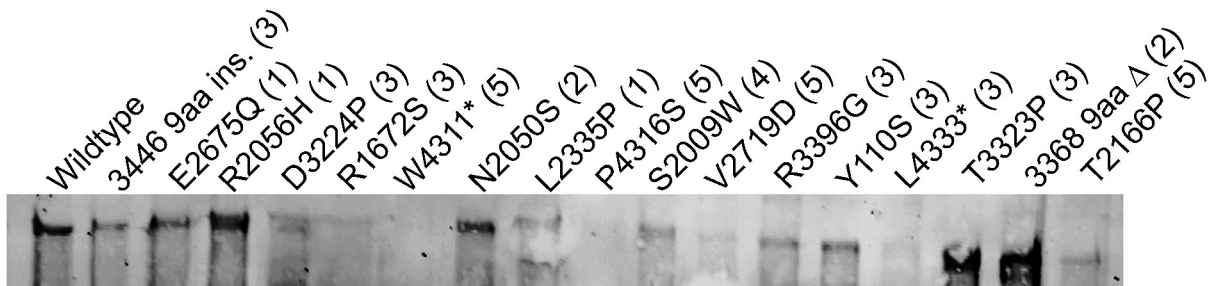

**Figure S2** Protein levels in representative DHC mutant strains. Western blot analysis of DHC expression/protein levels in 17 of the 34 mutant strains, including at least one representative from every class. The class of each strain is indicated in parentheses after the designated strain name.
