# Supplementary material
Source: PubMed Central journal article supplement (PMC3415999)
Supplement: supp_112.141580_FigureS3.pdf [file supp_112.141580_FigureS3.pdf]

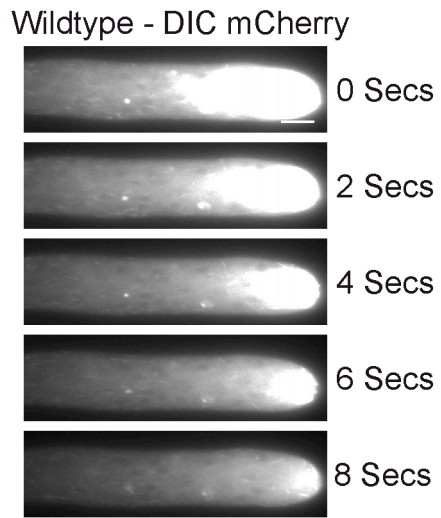

**Figure S3** An 8-second time series showing photobleaching of bright hyphal tip dynein fluorescence in a wildtype strain. Bars: 10  $\mu\text{m}$ .
