# Supplementary material
Source: PubMed Central journal article supplement (PMC3415999)
Supplement: supp_112.141580_FigureS4.pdf [file supp_112.141580_FigureS4.pdf]

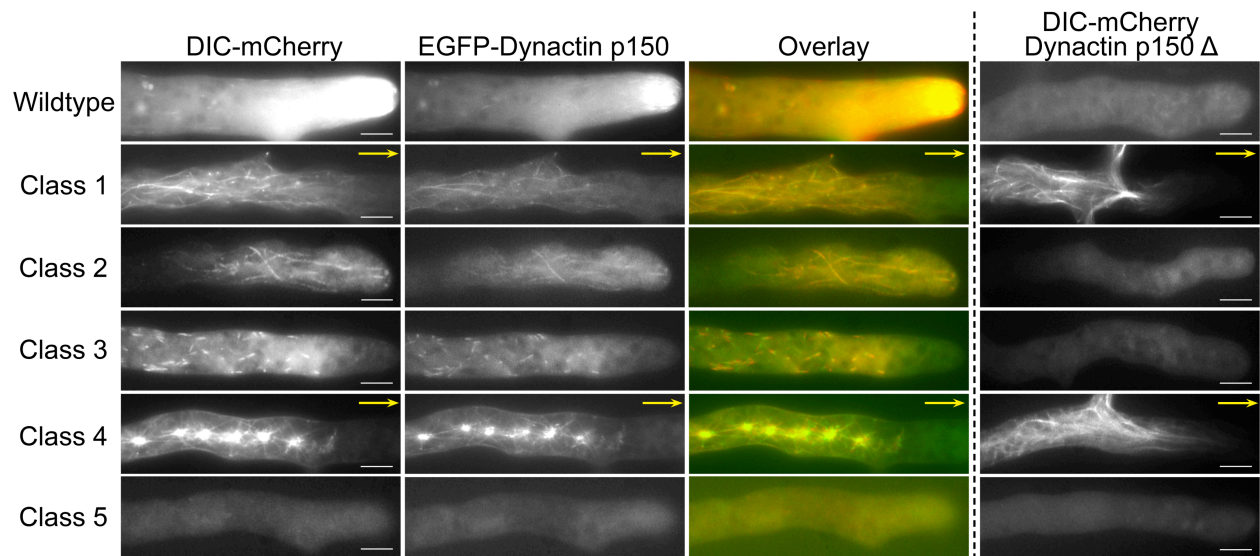

**Figure S4** Colocalization of dynein and dynactin in wildtype and DHC mutant strains. **A.** Epifluorescence images of growing hyphae in strains expressing DIC-mCherry and EGFP- dynactin p150. Left panels: dynein; middle panels: dynactin, right panels: overlay. **B.** Epifluorescence images of growing hyphae in strains expressing DIC-mCherry in dynactin p150 null background. Bars: 10  $\mu$ m in all panels.
