# Supplementary material
Source: PubMed Central journal article supplement (PMC3415999)
Supplement: supp_112.141580_FigureS5.pdf [file supp_112.141580_FigureS5.pdf]

**A**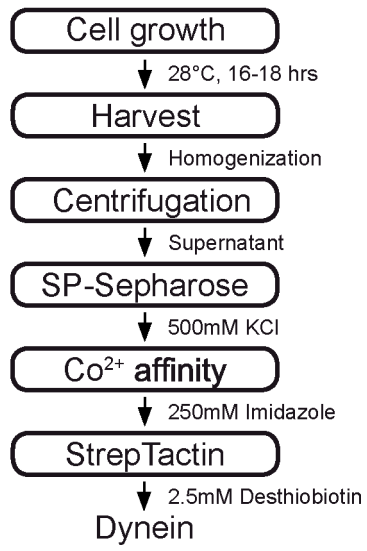**B**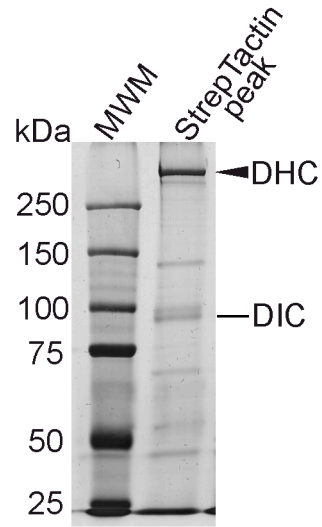

**Figure S5** **A.** Dynein purification scheme for *N.crassa*. **B.** Representative silver-stained gel image showing the final elution fraction from the StrepTrap column. The arrow points to the DHC band and the bar indicates the band corresponding to the tagged DIC.
