# Supplementary material
Source: PubMed Central journal article supplement (PMC3415999)
Supplement: supp_112.141580_TableS1.pdf [file supp_112.141580_TableS1.pdf]

**Table S1 Summary of vesicle transport dynamics.**

|                                                               | Wildtype        | DHC $\Delta$        | p150 $\Delta$       | Nkin mut.           | Class 1             | Class 2             | Class 3          | Class 4             | Class 5             |
|---------------------------------------------------------------|-----------------|---------------------|---------------------|---------------------|---------------------|---------------------|------------------|---------------------|---------------------|
| Motility index                                                | 21.5            | 5.8                 | 8.3                 | 4.1                 | 10.4                | 4.9                 | 9.4              | 7.4                 | 6.2                 |
| Overall movements                                             |                 |                     |                     |                     |                     |                     |                  |                     |                     |
| Mean movements/<br>$\mu\text{m}$ hyphal length                | 2.9             | 1.2                 | 1.8                 | 0.8                 | 1.5                 | 1.2                 | 2.4              | 1.7                 | 1.1                 |
| <i>n</i>                                                      | 557             | 185                 | 286                 | 162                 | 199                 | 110                 | 247              | 200                 | 170                 |
| Mean velocity<br>( $\mu\text{m}/\text{sec} \pm \text{S.D.}$ ) | 1.64 $\pm$ 0.59 | 1.46 $\pm$<br>0.62* | 1.34 $\pm$<br>0.49* | 1.35 $\pm$<br>0.52* | 1.51 $\pm$<br>0.59* | 1.24 $\pm$<br>0.41* | 1.33 $\pm$ 0.45* | 1.33 $\pm$<br>0.41* | 1.31 $\pm$<br>0.48* |
| Mean distance<br>( $\mu\text{m} \pm \text{S.D.}$ )            | 4.26 $\pm$ 0.54 | 3.03 $\pm$<br>1.71* | 3.19 $\pm$<br>1.44* | 3.49 $\pm$<br>2.07* | 4.48 $\pm$ 2.59     | 3.21 $\pm$<br>1.64* | 2.85 $\pm$ 1.15* | 3.17 $\pm$<br>1.33* | 3.96 $\pm$ 2.33     |
| Inward movements                                              |                 |                     |                     |                     |                     |                     |                  |                     |                     |
| Percent of total<br>movements                                 | 48.7 %          | 47.1 %              | 48.9 %              | 48.8 %              | 41.7 %              | 52.7 %              | 53.8 %           | 41.5 %              | 47.1 %              |
| Mean velocity<br>( $\mu\text{m}/\text{sec} \pm \text{S.D.}$ ) | 1.60 $\pm$ 0.55 | 1.36 $\pm$<br>0.53* | 1.27 $\pm$<br>0.51* | 1.36 $\pm$<br>0.53* | 1.43 $\pm$<br>0.54* | 1.23 $\pm$<br>0.45* | 1.29 $\pm$ 0.48* | 1.24 $\pm$<br>0.40* | 1.28 $\pm$<br>0.53* |
| Mean distance<br>( $\mu\text{m} \pm \text{S.D.}$ )            | 4.16 $\pm$ 2.47 | 2.70 $\pm$<br>1.27* | 2.78 $\pm$<br>1.12* | 3.23 $\pm$<br>1.88* | 3.90 $\pm$ 2.62     | 2.86 $\pm$<br>1.38* | 2.69 $\pm$ 1.02* | 2.66 $\pm$<br>0.96* | 3.77 $\pm$ 2.40     |
| Outward movements                                             |                 |                     |                     |                     |                     |                     |                  |                     |                     |
| Percent of total<br>movements                                 | 51.3 %          | 52.9 %              | 51.1 %              | 51.2 %              | 58.3 %              | 47.3 %              | 46.2 %           | 58.5 %              | 52.9 %              |
| Mean velocity<br>( $\mu\text{m}/\text{sec} \pm \text{S.D.}$ ) | 1.67 $\pm$ 0.61 | 1.55 $\pm$ 0.69     | 1.41 $\pm$<br>0.47* | 1.35 $\pm$<br>0.51* | 1.56 $\pm$ 0.62     | 1.24 $\pm$<br>0.36* | 1.38 $\pm$ 0.42* | 1.40 $\pm$<br>0.41* | 1.35 $\pm$<br>0.44* |
| Mean distance<br>( $\mu\text{m} \pm \text{S.D.}$ )            | 4.36 $\pm$ 2.60 | 3.32 $\pm$<br>1.98* | 3.59 $\pm$<br>1.59* | 3.75 $\pm$<br>2.22* | 4.89 $\pm$ 2.49     | 3.57 $\pm$<br>1.83* | 3.05 $\pm$ 1.27* | 3.53 $\pm$<br>1.45* | 4.13 $\pm$ 2.26     |
| Vesicle accumulation                                          |                 |                     |                     |                     |                     |                     |                  |                     |                     |
| Hyphal tip vesicle<br>accumulation                            | 60.0 %          | 92.3 %              | 27.3 %              | 100 %               | 72.7 %              | 86.7 %              | 90.0 %           | 78.6 %              | 100 %               |
| Hyphal body vesicle<br>accumulation                           | 13.3 %          | 7.7 %               | 90.9 %              | 0 %                 | 9.1 %               | 6.7 %               | 20.0 %           | 21.4 %              | 0 %                 |

\* = statistically significant difference from wild-type value as determined by students t-test ( $P < 0.05$ ).
