# Supplementary material
Source: PubMed Central journal article supplement (PMC3415999)
Supplement: supp_112.141580_TableS2.pdf [file supp_112.141580_TableS2.pdf]

**Table S2 Summary of dynein mislocalization phenotypes.**

| Mislocalization phenotype                      | Domain                             | Mutation                        |
|------------------------------------------------|------------------------------------|---------------------------------|
| Class 1<br>(Distal -<br>long linear<br>tracks) | AAA1 (Turn p-loop)                 | G1946R                          |
|                                                | AAA1 (H4)                          | R2056H                          |
|                                                | AAA2 (PS1 Insert)                  | S2333R                          |
|                                                | AAA2 (PS I Insert)                 | L2335P                          |
|                                                | AAA3 ( $\beta$ 3/Walker B)         | E2675Q                          |
|                                                | AAA5 (Strut C1)                    | 3739 6aa $\Delta$ (RRSNLI)      |
| Class 2<br>(Apical -<br>long linear<br>tracks) | AAA1(Sensor 1 ( $\beta$ 4))        | N2050S                          |
|                                                | AAA3 ( $\beta$ 4 before sensor 1 ) | C2722R                          |
|                                                | MT Stalk (H8 - CC1)                | 3268 9aa $\Delta$ (SLEIQAALE)   |
|                                                | AAA6 (H1)                          | V4049D                          |
| Class 3<br>(Comet tails)                       | Tail                               | Y110S                           |
|                                                | Tail                               | W1308G                          |
|                                                | Linker Subdomain 3 (H11 )          | R1672S                          |
|                                                | MT Stalk (H8 - CC1)                | D3224P                          |
|                                                | MT-binding domain (H1) o)MTBD      | T3323P                          |
|                                                | MT-Stalk (CC2)                     | L3332P                          |
|                                                | MT-binding domain (H7)             | R3396G                          |
|                                                | MT-stalk ( H9 - CC2)               | 3446 9aa ins.                   |
|                                                | C-terminus (H1)                    | L4333*                          |
| Class 4<br>(Aggregates)                        | AAA1 (H3)                          | S2009W                          |
|                                                | MT-BS (H8 stalk CC1)               | G3215D                          |
|                                                | AAA5 (Strut C1)                    | 3756 7aa $\Delta$ (QLEKLL)      |
| Class 5<br>(Disperse)                          | AAA1 (H0)                          | L1933P                          |
|                                                | AAA1 (AAA1 H1 and B2)              | G1961R                          |
|                                                | AAA1 (H4/ $\beta$ 4 R finger)      | K2065E                          |
|                                                | AAA1 (H8)                          | T2166P                          |
|                                                | AAA3 ( $\beta$ 4 before sensor 1)  | V2719D                          |
|                                                | AAA5 (H0)                          | I3591P                          |
|                                                | AAA6 (H5)                          | G4146A                          |
|                                                | AAA6 (H7)                          | E4168K                          |
|                                                | AAA6 (between H8-H9)               | I4232N                          |
|                                                | AAA6 (between h11 and h12)         | D4296E; 4297 3aa $\Delta$ (LVV) |
|                                                | AAA6 (H12)                         | W4311*                          |
|                                                | AAA6 ( between H12-H13)            | P4316S                          |

AAA- AAA domains of dynein, MT – microtubule, H – helix,  $\beta$  –  $\beta$  strand, CC- coiled-coil, aa - amino acid,  $\Delta$  - deletion, ins - insertion, \* - nonsense mutation.
