# Supplementary material
Source: PubMed Central journal article supplement (PMC3415999)
Supplement: supp_112.141580_TableS3.pdf [file supp_112.141580_TableS3.pdf]

**Table S3 Primary *Neurospora crassa* strains used in this study.**

| Genotype                                                                          | Source     | Description                                         |
|-----------------------------------------------------------------------------------|------------|-----------------------------------------------------|
| <i>mat a</i>                                                                      | FGSC       | WT strain (FGSC # 4200)                             |
| <i>mat A</i>                                                                      | FGSC       | WT strain (FGSC # 2489)                             |
| <i>mat a; kin-1</i>                                                               | FGSC       | Nkin mutant strain (FGSC # 9939)                    |
| <i>mat a; ro-1::hygr</i>                                                          | This study | DHC $\Delta$ mutant strain                          |
| <i>mat a; ro-3::hygr</i>                                                          | FGSC       | Dynactin p150 $\Delta$ mutant strain (FGSC # 14726) |
| <i>rid(RIP1) mat A his-3<sup>+</sup>::Pccg-1-Bml<sup>+</sup>-sgfp<sup>+</sup></i> | FGSC       | Tubulin-GFP strain (FGSC # 9520)                    |
| <i>mat A his-3<sup>+</sup>::Pccg-1-hH1<sup>+</sup>-sgfp<sup>+</sup></i>           | FGSC       | Histone h1-GFP strain (FGSC # 9518)                 |
| <i>mat a ro-6<sup>7bp <math>\Delta</math> 1695</sup></i>                          | This study | DIC mutant strain                                   |
| <i>mat A ro-6<sup>+</sup>::mCherry<sup>+</sup></i>                                | This study | WT DIC-mCherry strain                               |
| <i>mat A ro-6<sup>+</sup>::mCherry<sup>+</sup>; kin-1</i>                         | This study | Nkin mutant - DIC-mCherry strain                    |
| <i>mat A ro-6<sup>+</sup>::mCherry<sup>+</sup>; <math>\Delta</math> ro-3</i>      | This study | Dynactin p150 $\Delta$ mutant - DIC-mCherry strain  |
| <i>mat A; ro-3<sup>+</sup>::egfp<sup>+</sup></i>                                  | This study | WT EGFP-Dynactin p150 strain                        |
| <i>mat A ro-6<sup>+</sup>::hs<sup>+</sup></i>                                     | This study | WT DIC-6xHis-Strep-tag II strain                    |
